# Supplementary material for: Extracellular Vesicles Derived from Three-Dimensional-Cultured Human Umbilical Cord Blood Mesenchymal Stem Cells Prevent Inflammation and Dedifferentiation in Pancreatic Islets
Source: Hindawi journal article supplement (doi:10.1155/2023/5475212), 2023-02-20

CD63

hUCB-MSC  
lysate  
2D Evs  
3D(25K) Evs

55kDa

37kDa

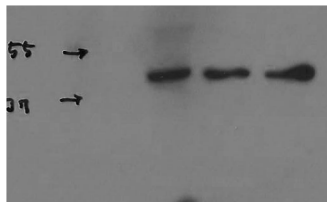

TSG101

hUCB-MSC  
lysate  
2D Evs  
3D(25K) Evs

55kDa

37kDa

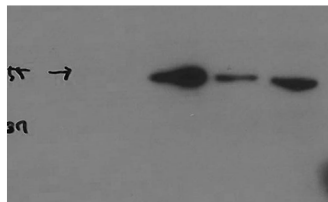

CANX

hUCB-MSC  
lysate  
2D Evs  
3D(25K) Evs

150kDa

100kDa

75kDa

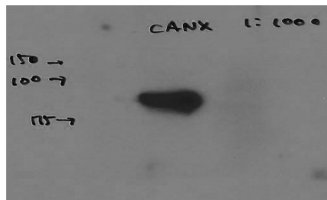

GM130

hUCB-MSC  
lysate  
2D Evs  
3D(25K) Evs

250kDa

150kDa

100kDa

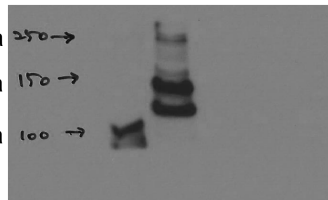

Supplement: f1 [file 5475212.f1.zip]
