# Supplementary figures and images for: Extracellular Vesicles Derived from Three-Dimensional-Cultured Human Umbilical Cord Blood Mesenchymal Stem Cells Prevent Inflammation and Dedifferentiation in Pancreatic Islets
Source: Hindawi journal article supplement (doi:10.1155/2023/5475212), 2023-02-20

**a**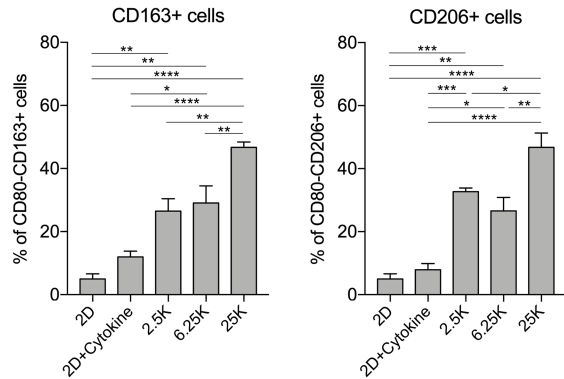**b**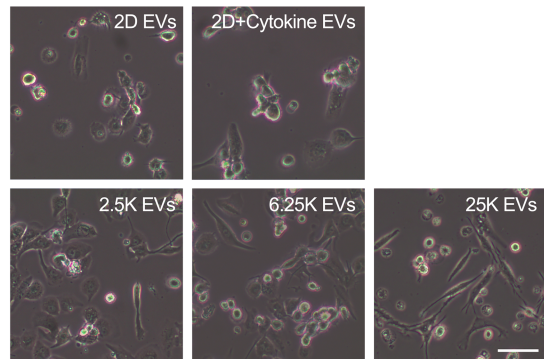**c**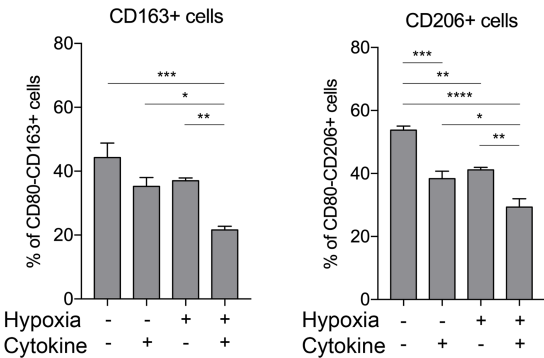**d**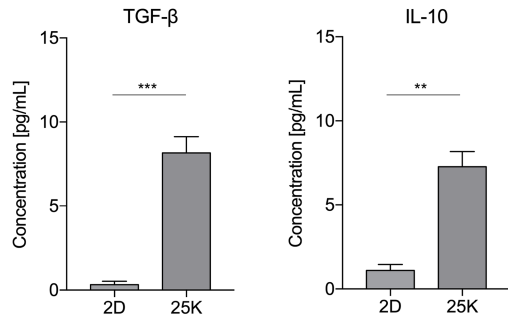

Supplement: f1 [file 5475212.f1.zip]

**a**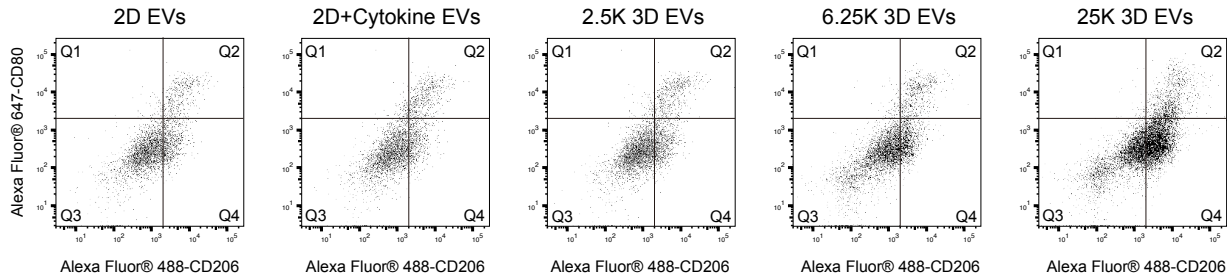**b**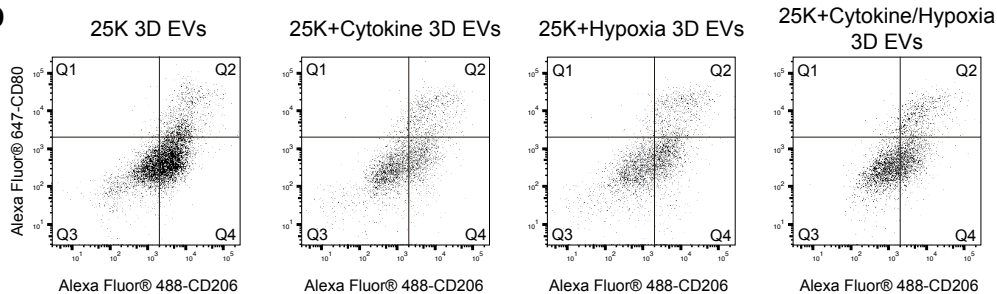

Supplement: f1 [file 5475212.f1.zip]
